# Supplementary material
Source: HighWire-hosted journal article supplement (https://gut.bmj.com/content/70/5/940)

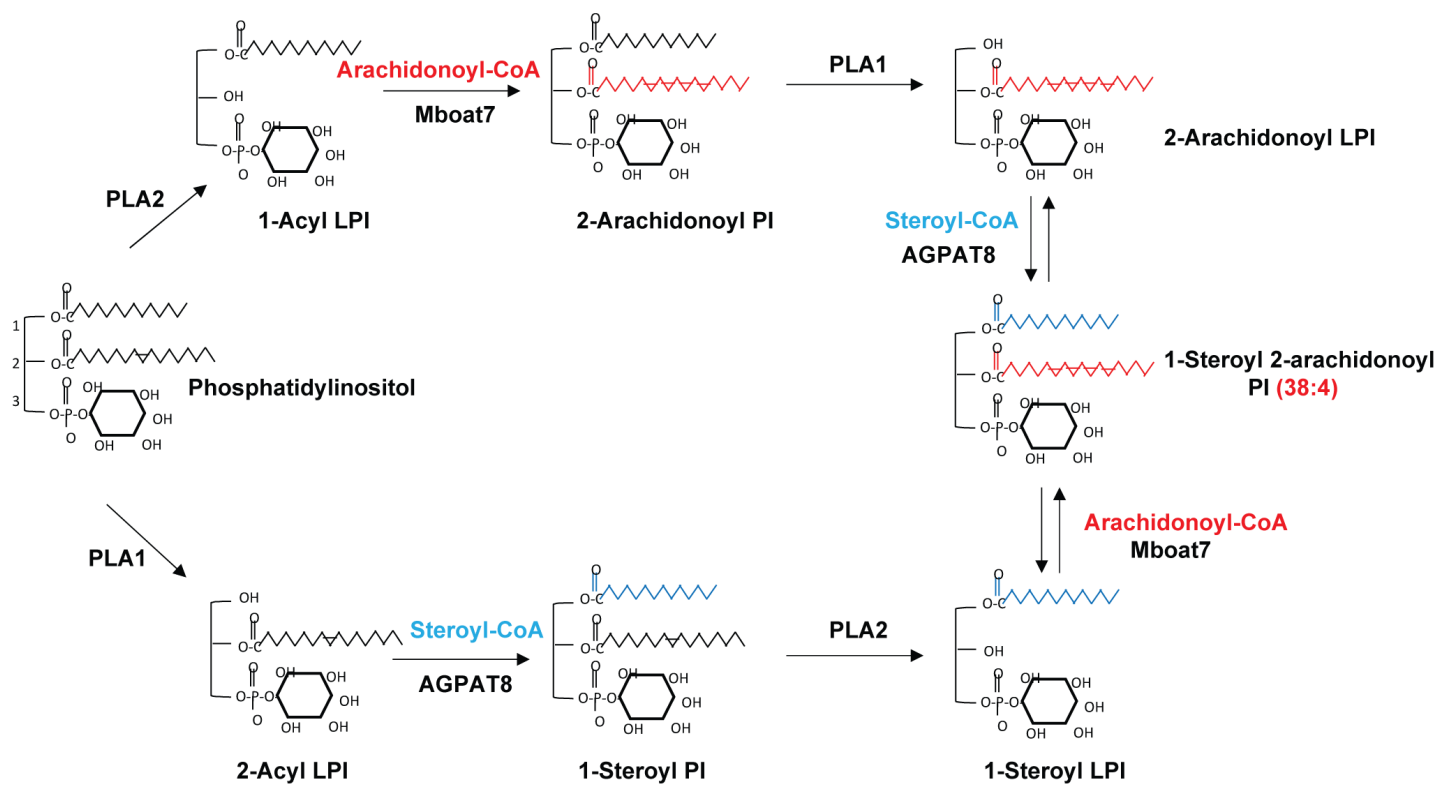

Supplement: inline-supplementary-material-18 [file inline-supplementary-material-18.pdf]
