# Supplementary material
Source: HighWire-hosted journal article supplement (https://gut.bmj.com/content/70/5/940)

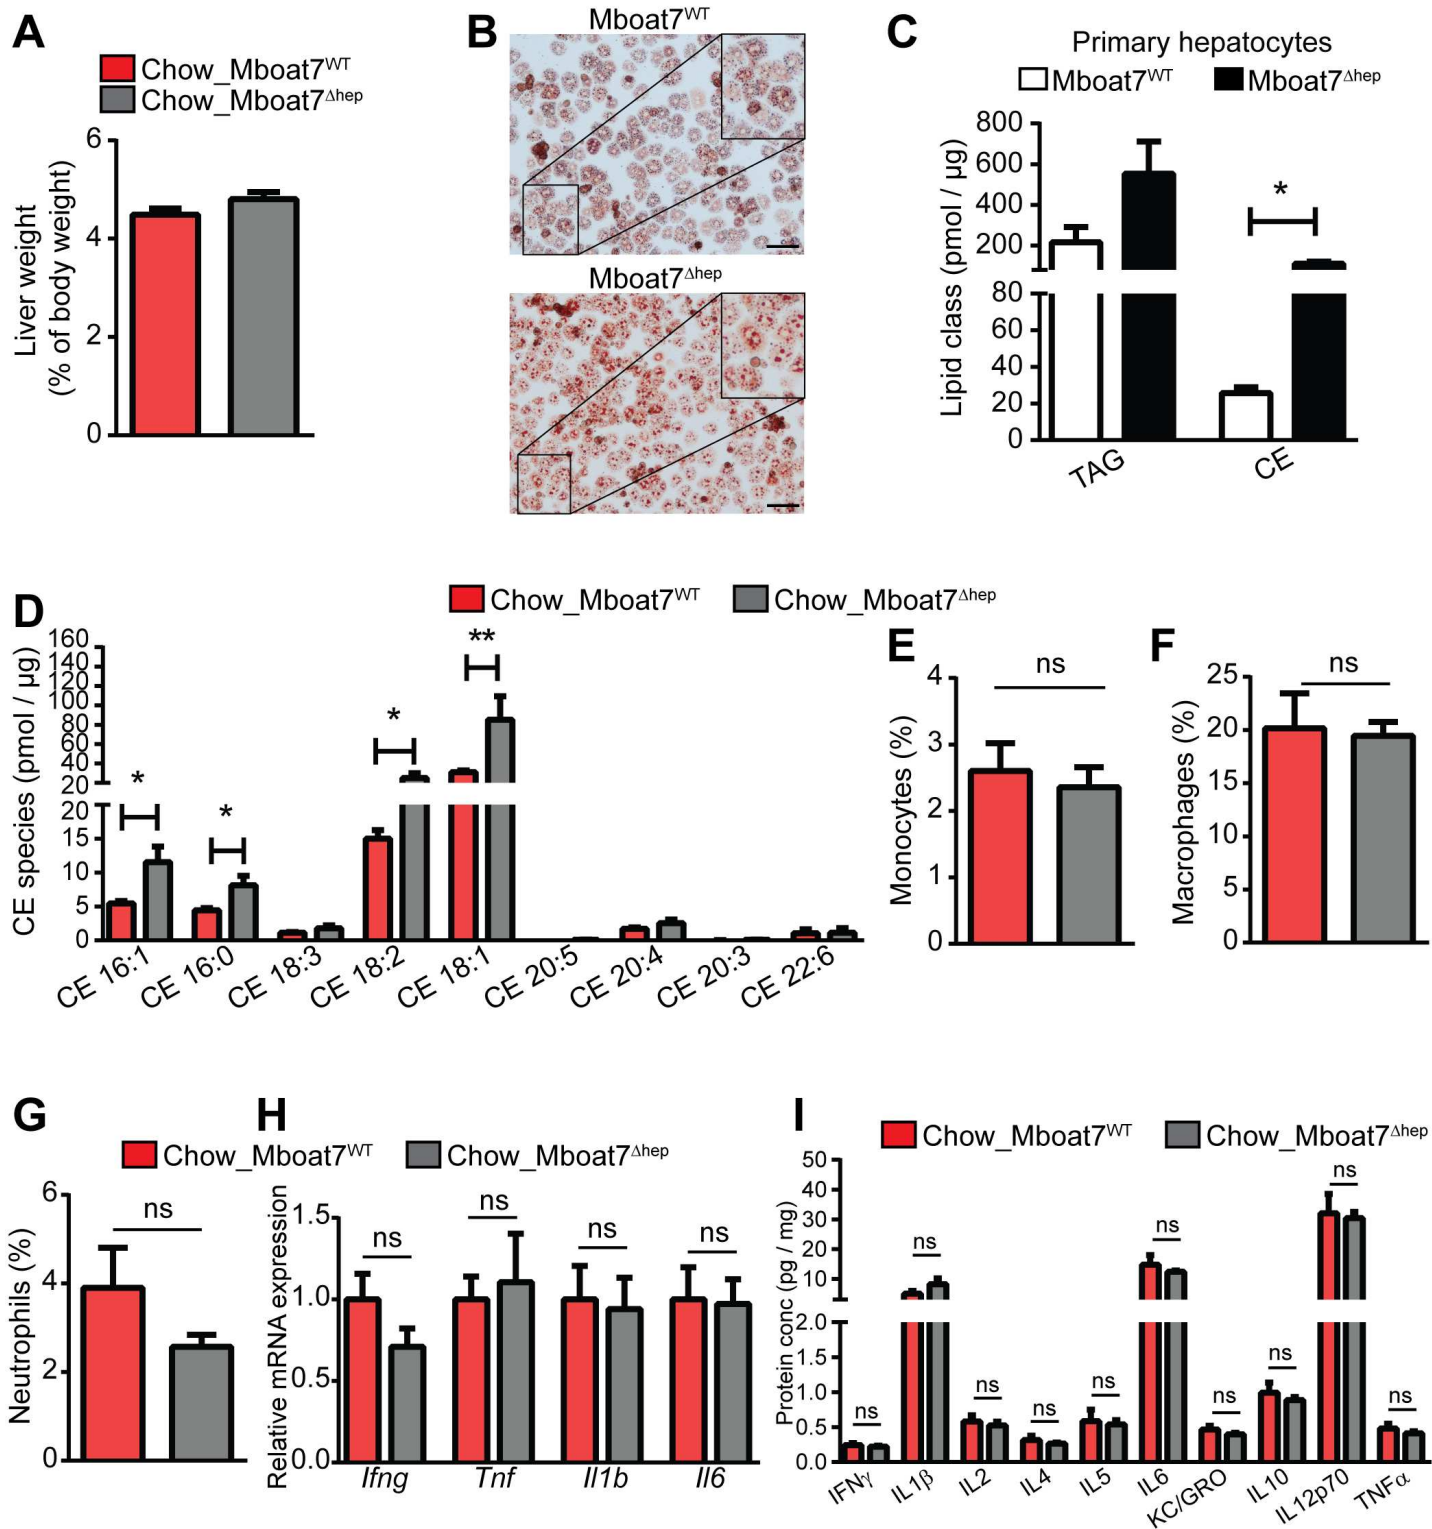

Supplement: inline-supplementary-material-11 [file inline-supplementary-material-11.pdf]

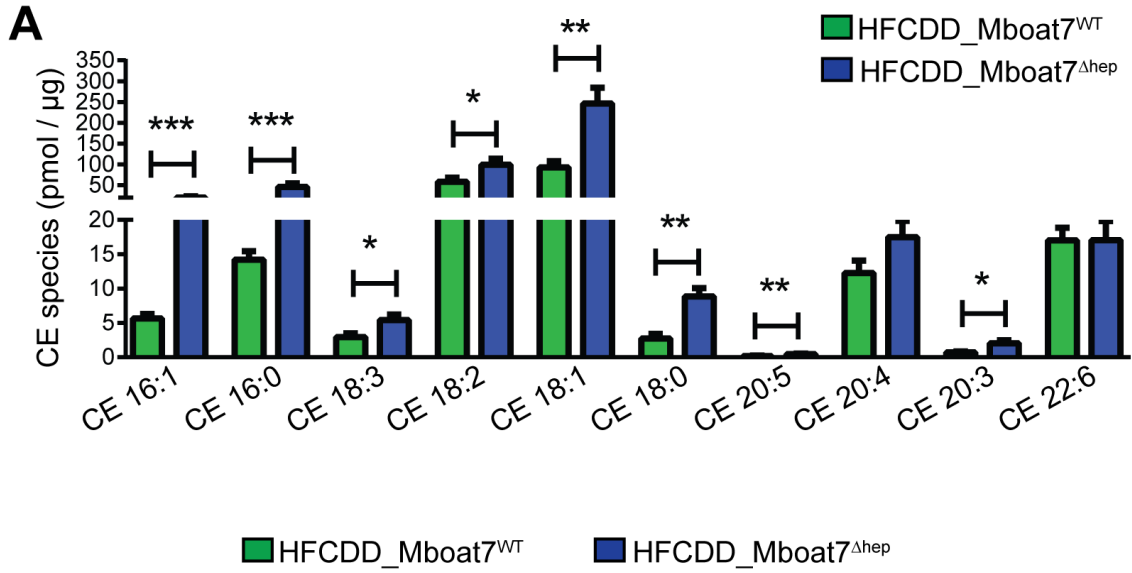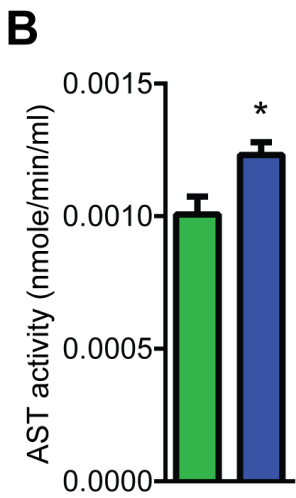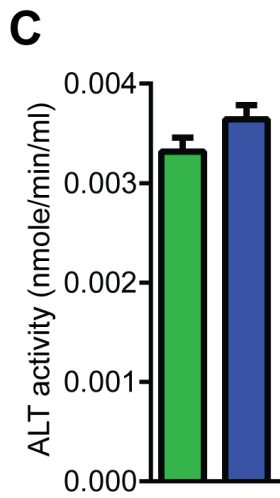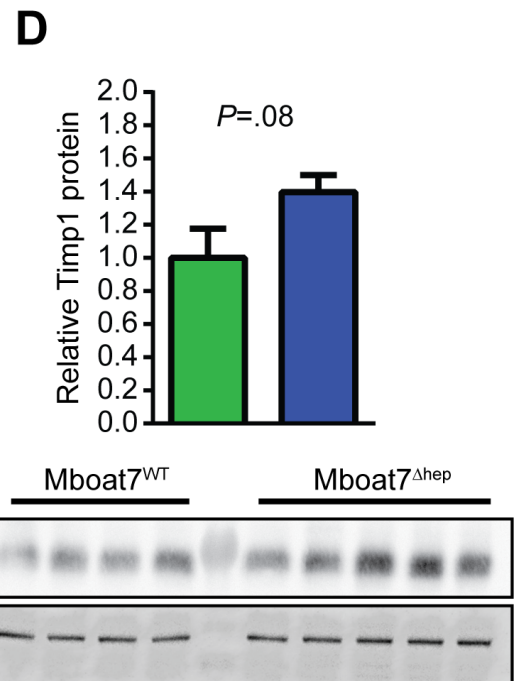

Supplement: inline-supplementary-material-14 [file inline-supplementary-material-14.pdf]

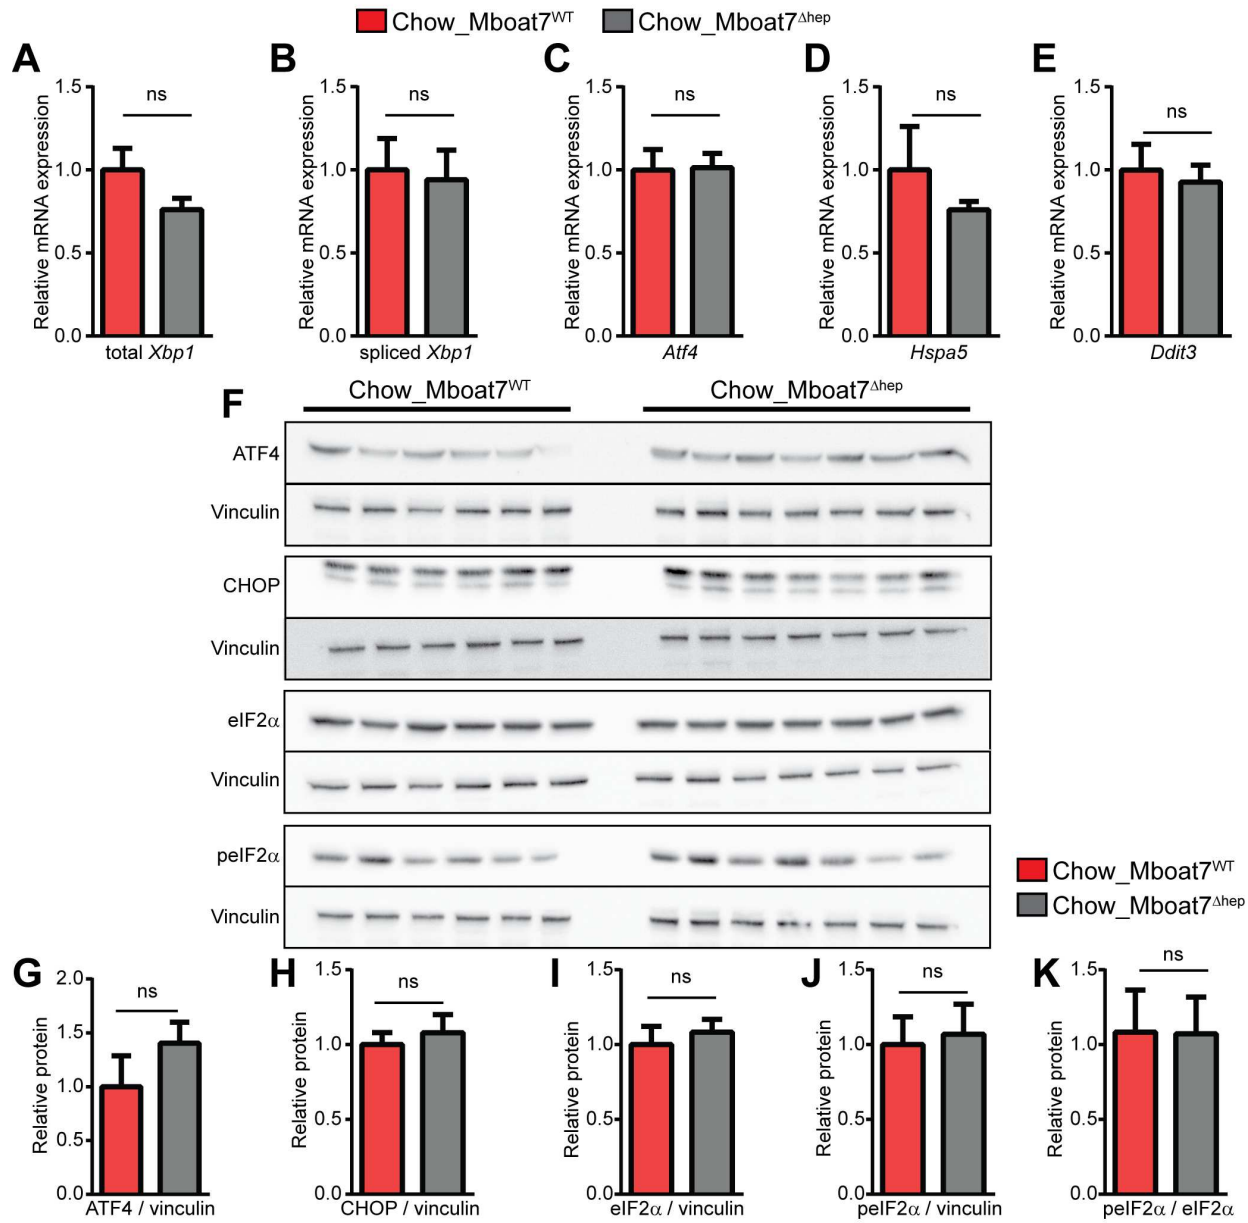

Supplement: inline-supplementary-material-17 [file inline-supplementary-material-17.pdf]

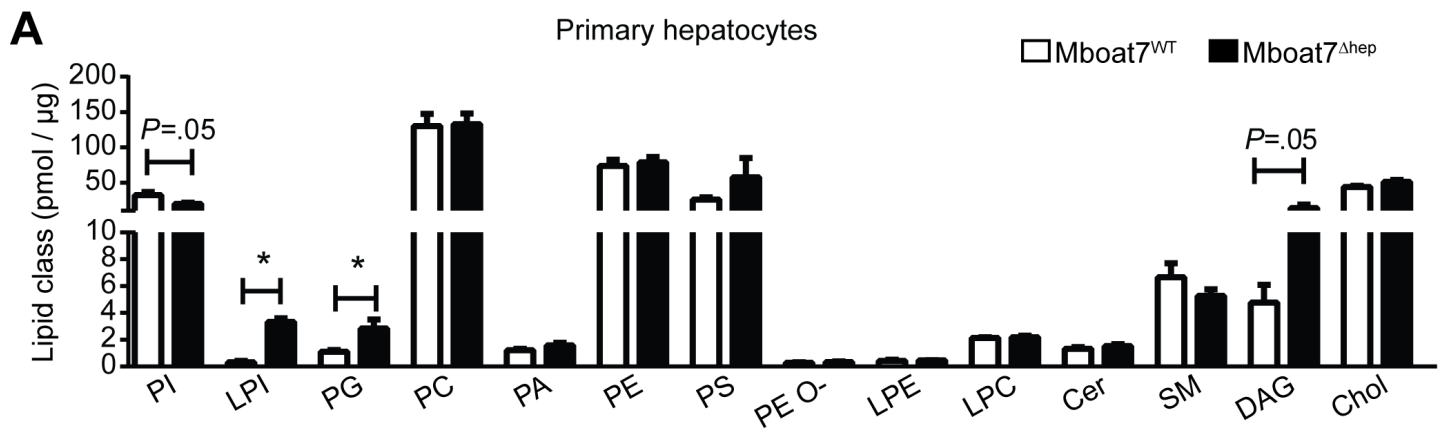

Supplement: inline-supplementary-material-19 [file inline-supplementary-material-19.pdf]

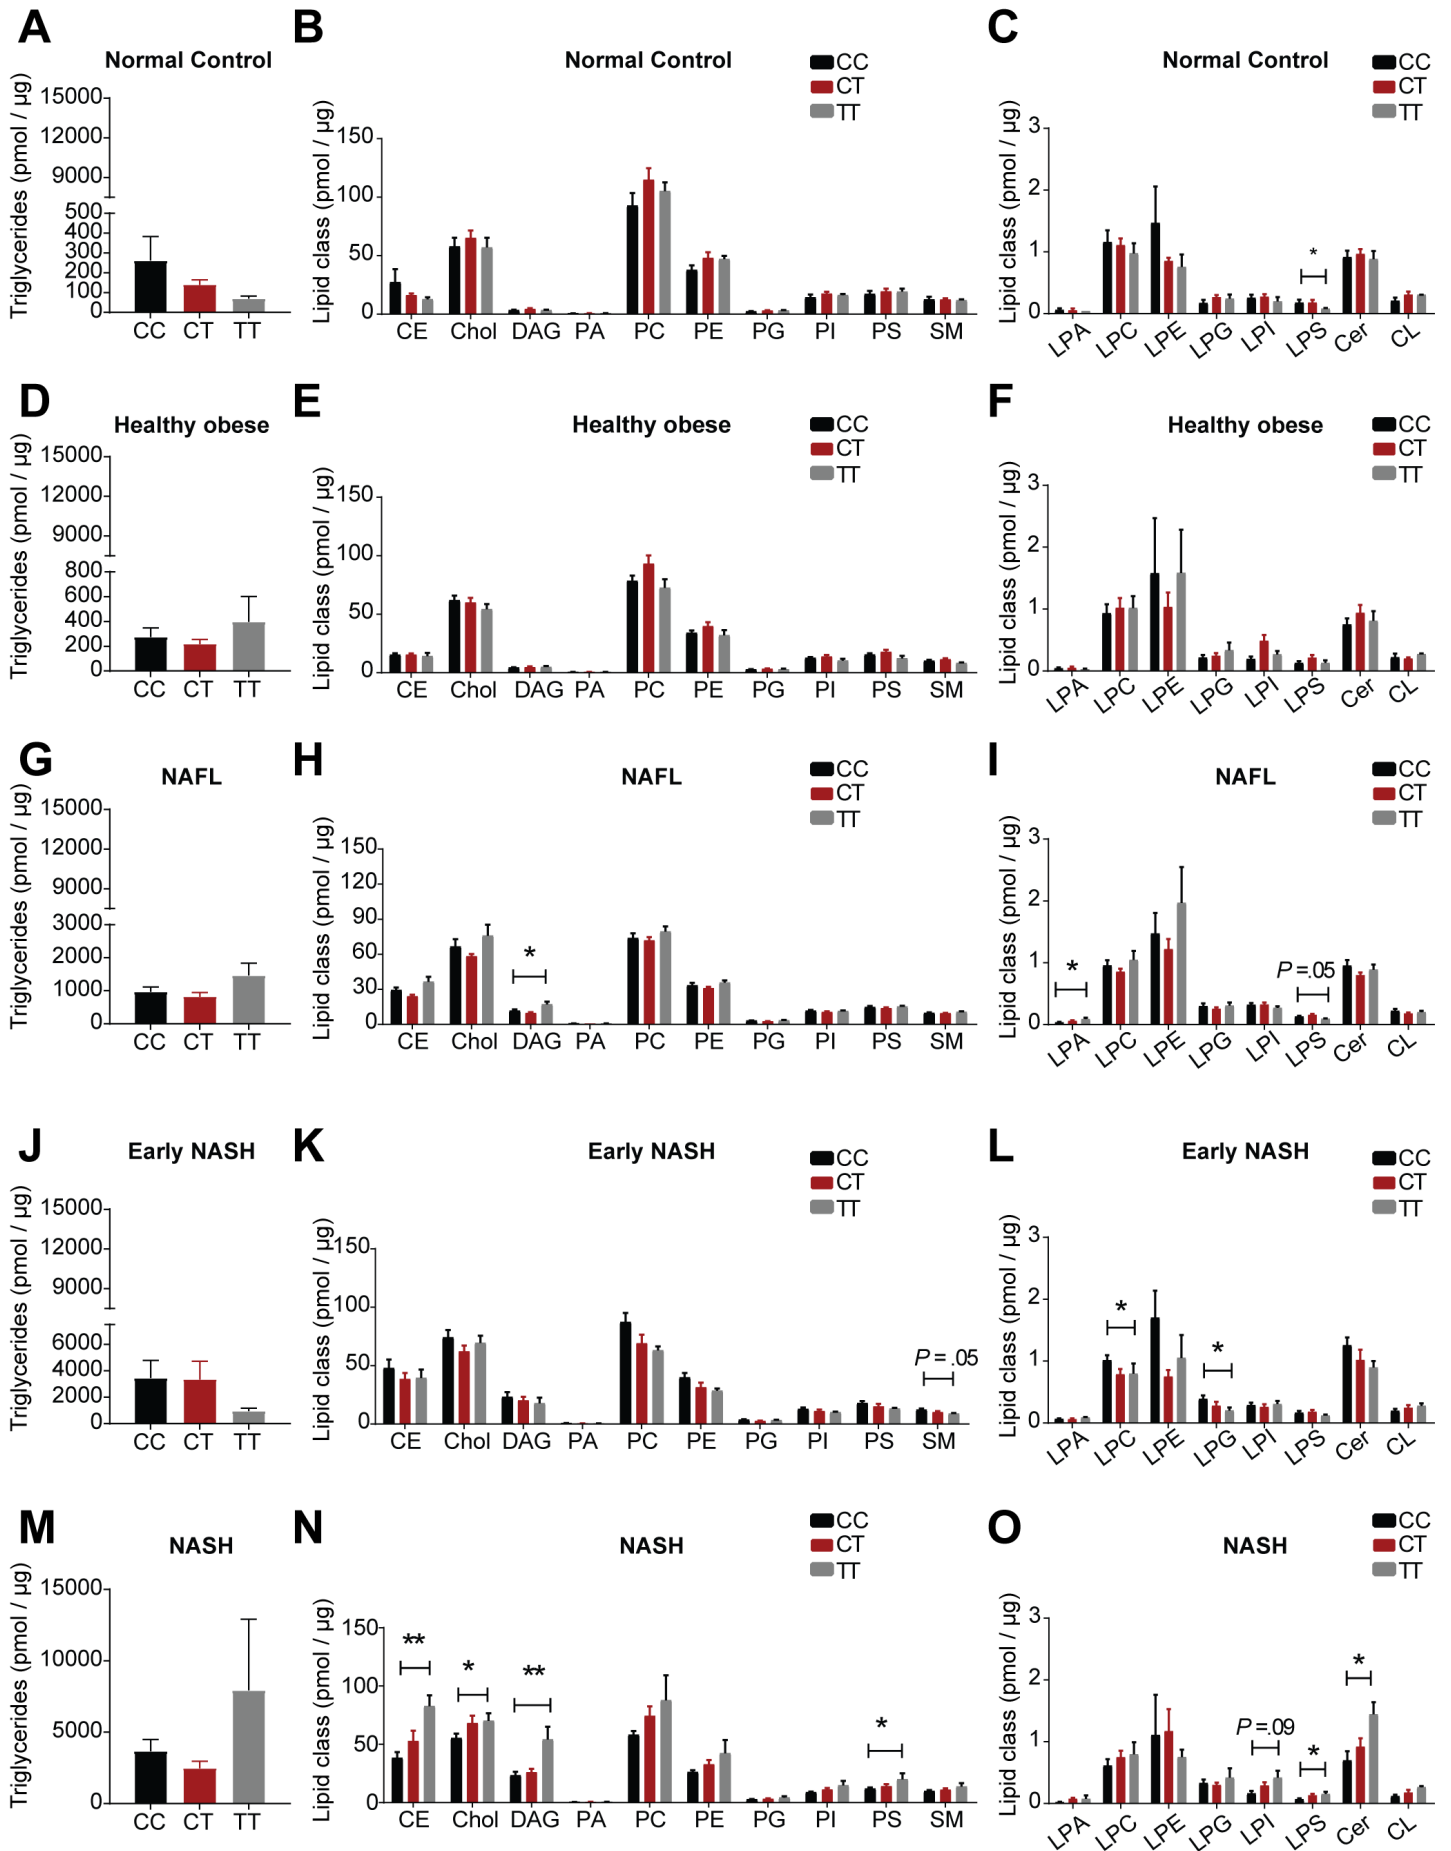

Supplement: inline-supplementary-material-21 [file inline-supplementary-material-21.pdf]

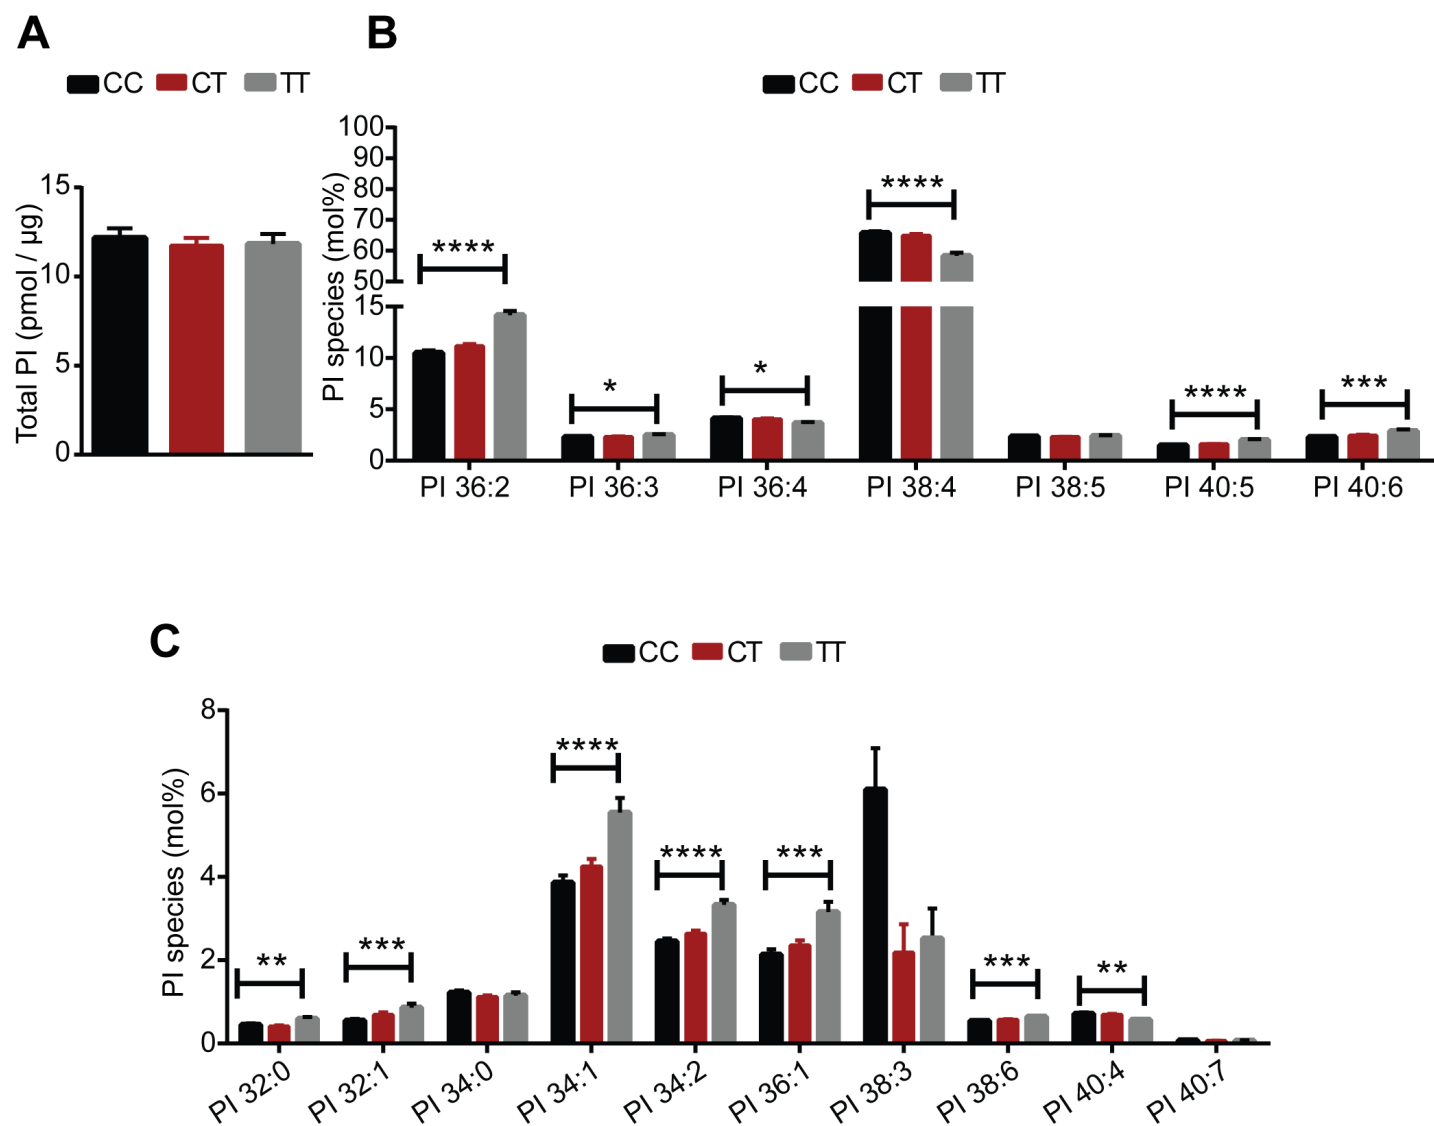

Supplement: inline-supplementary-material-22 [file inline-supplementary-material-22.pdf]

## Graphical Abstract

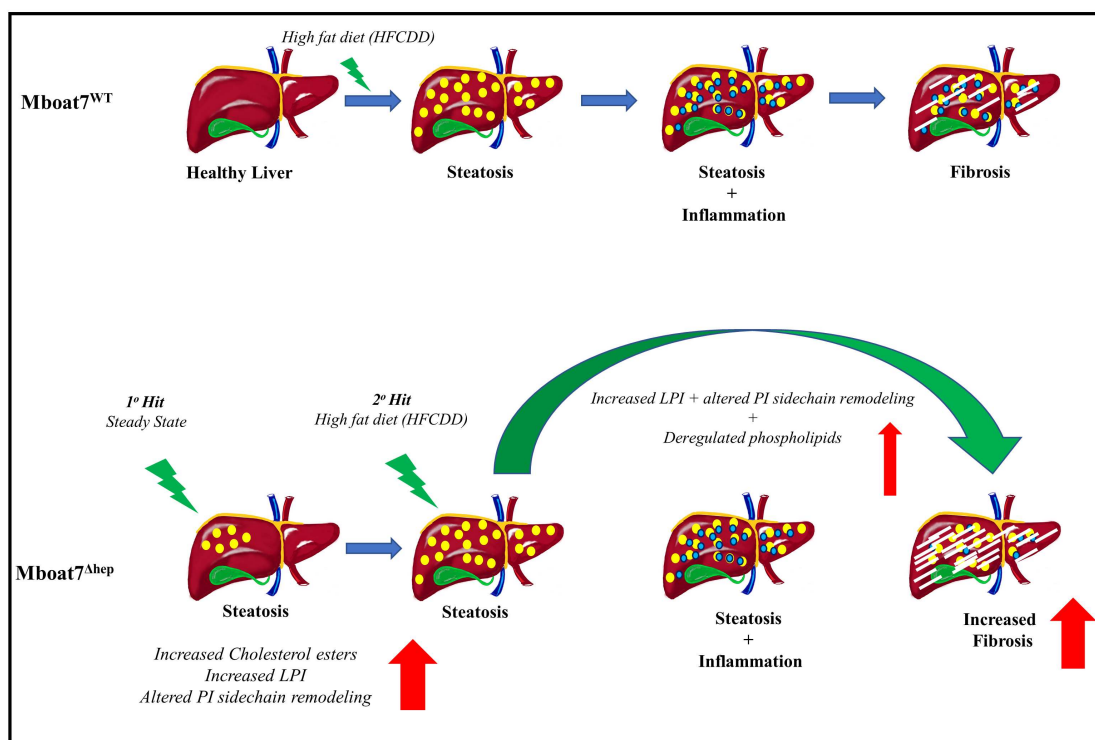

Supplement: inline-supplementary-material-23 [file inline-supplementary-material-23.pdf]

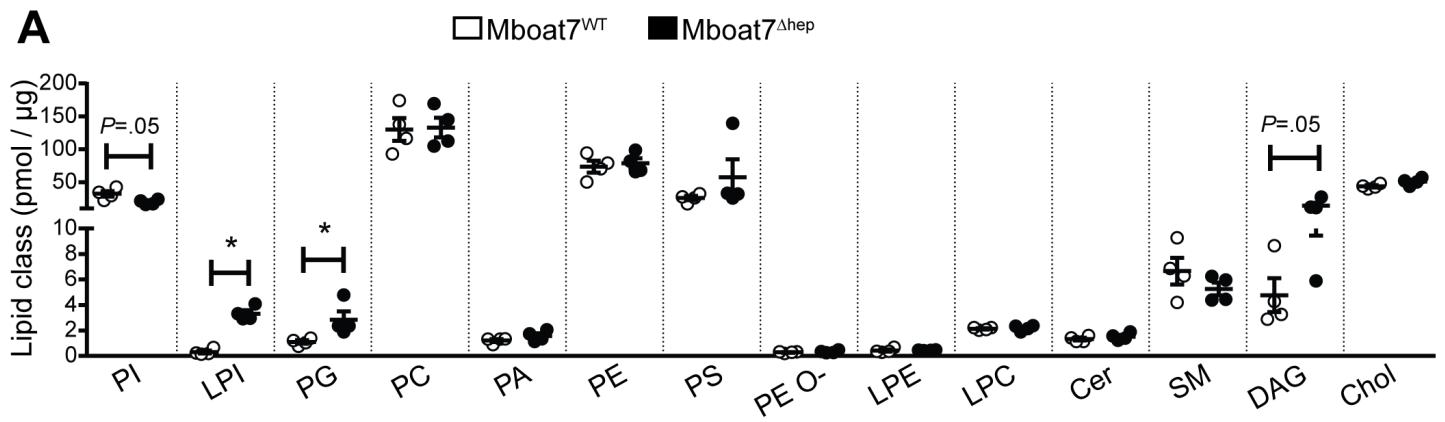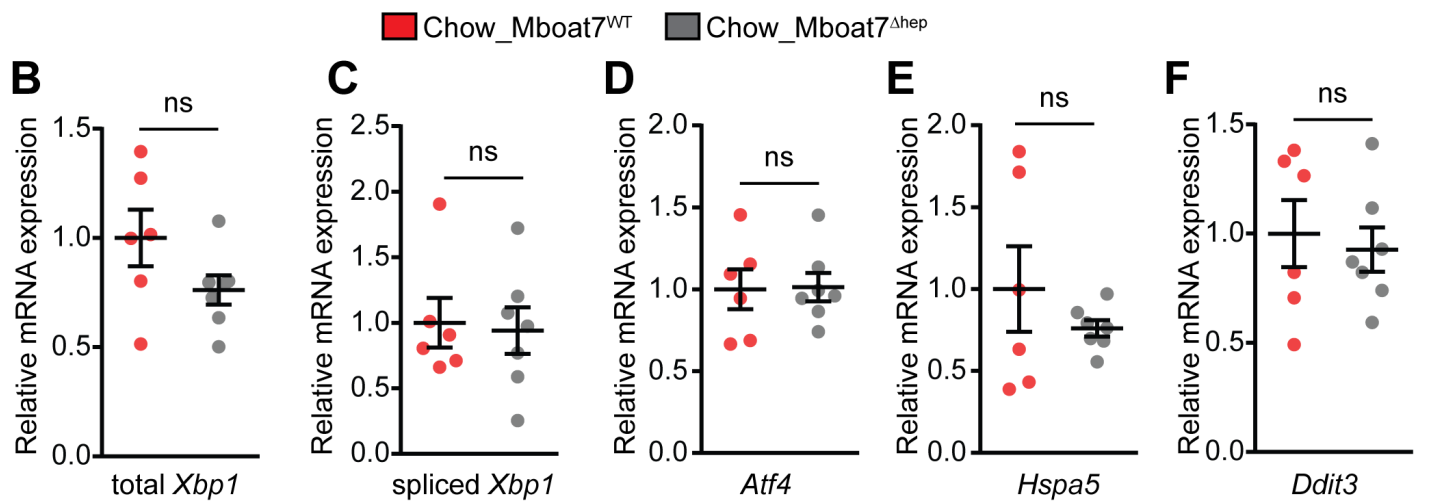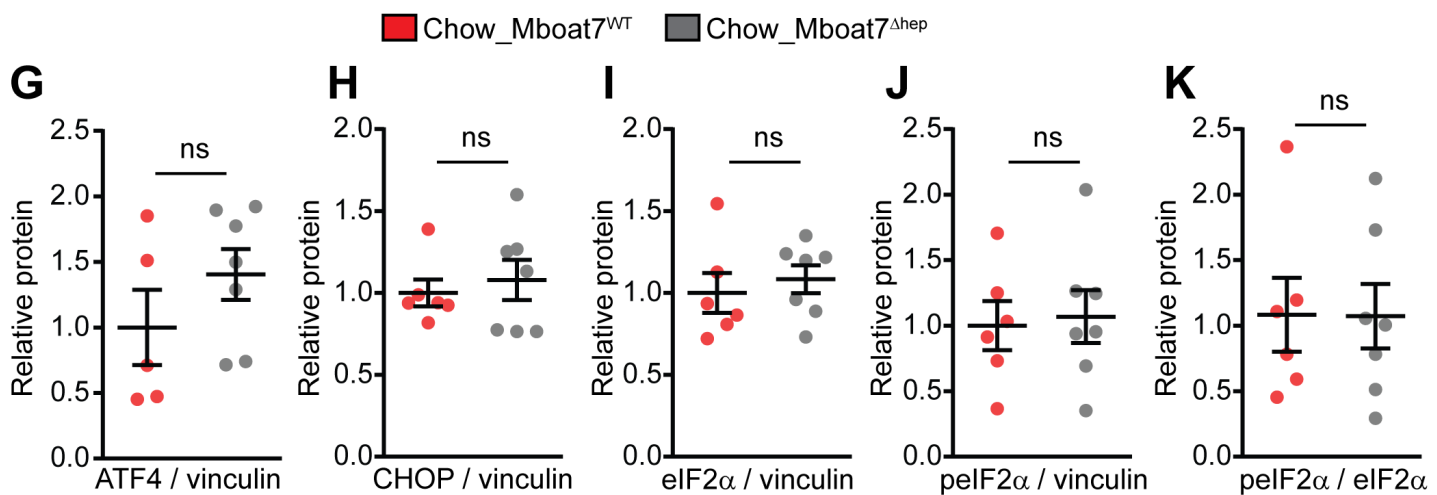

Supplement: inline-supplementary-material-4 [file inline-supplementary-material-4.pdf]

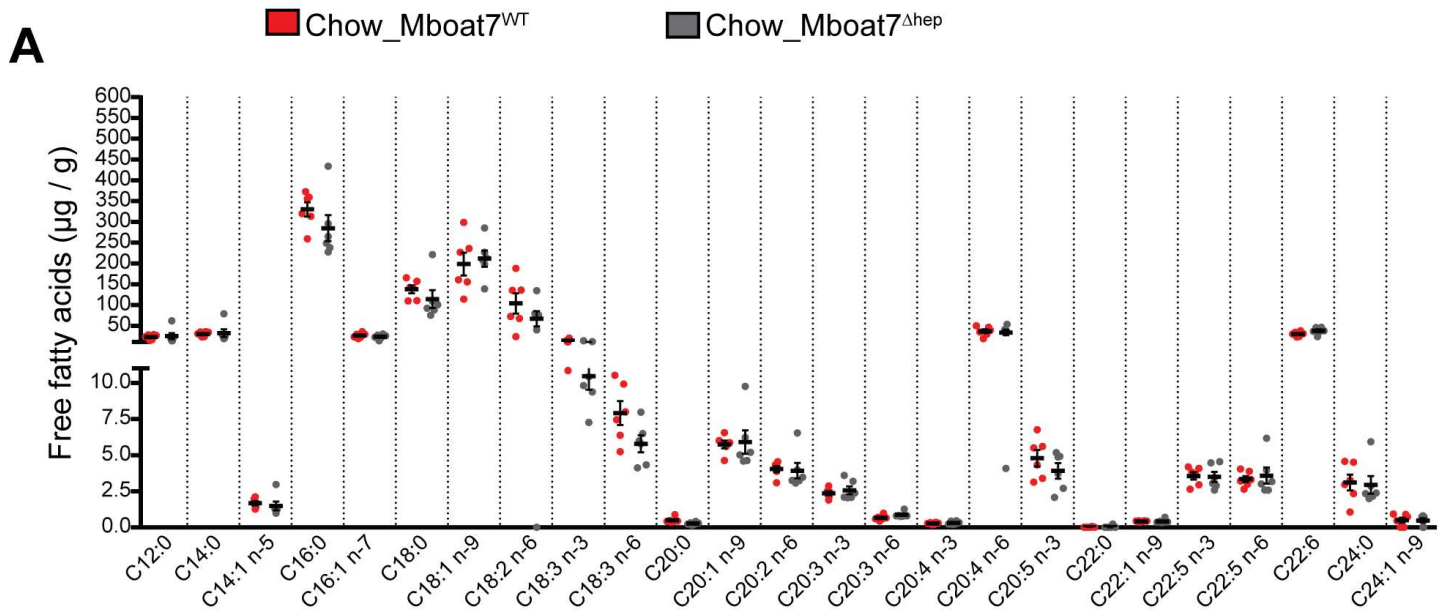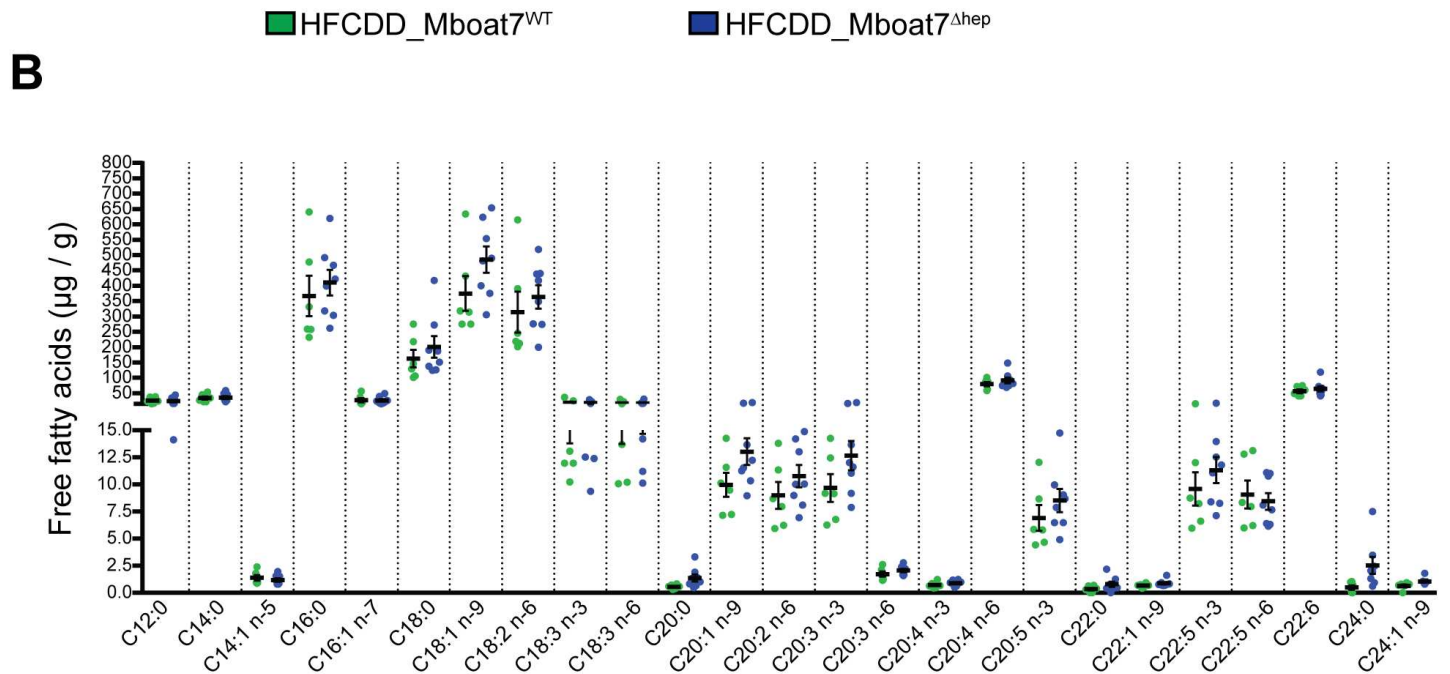

Supplement: inline-supplementary-material-5 [file inline-supplementary-material-5.pdf]

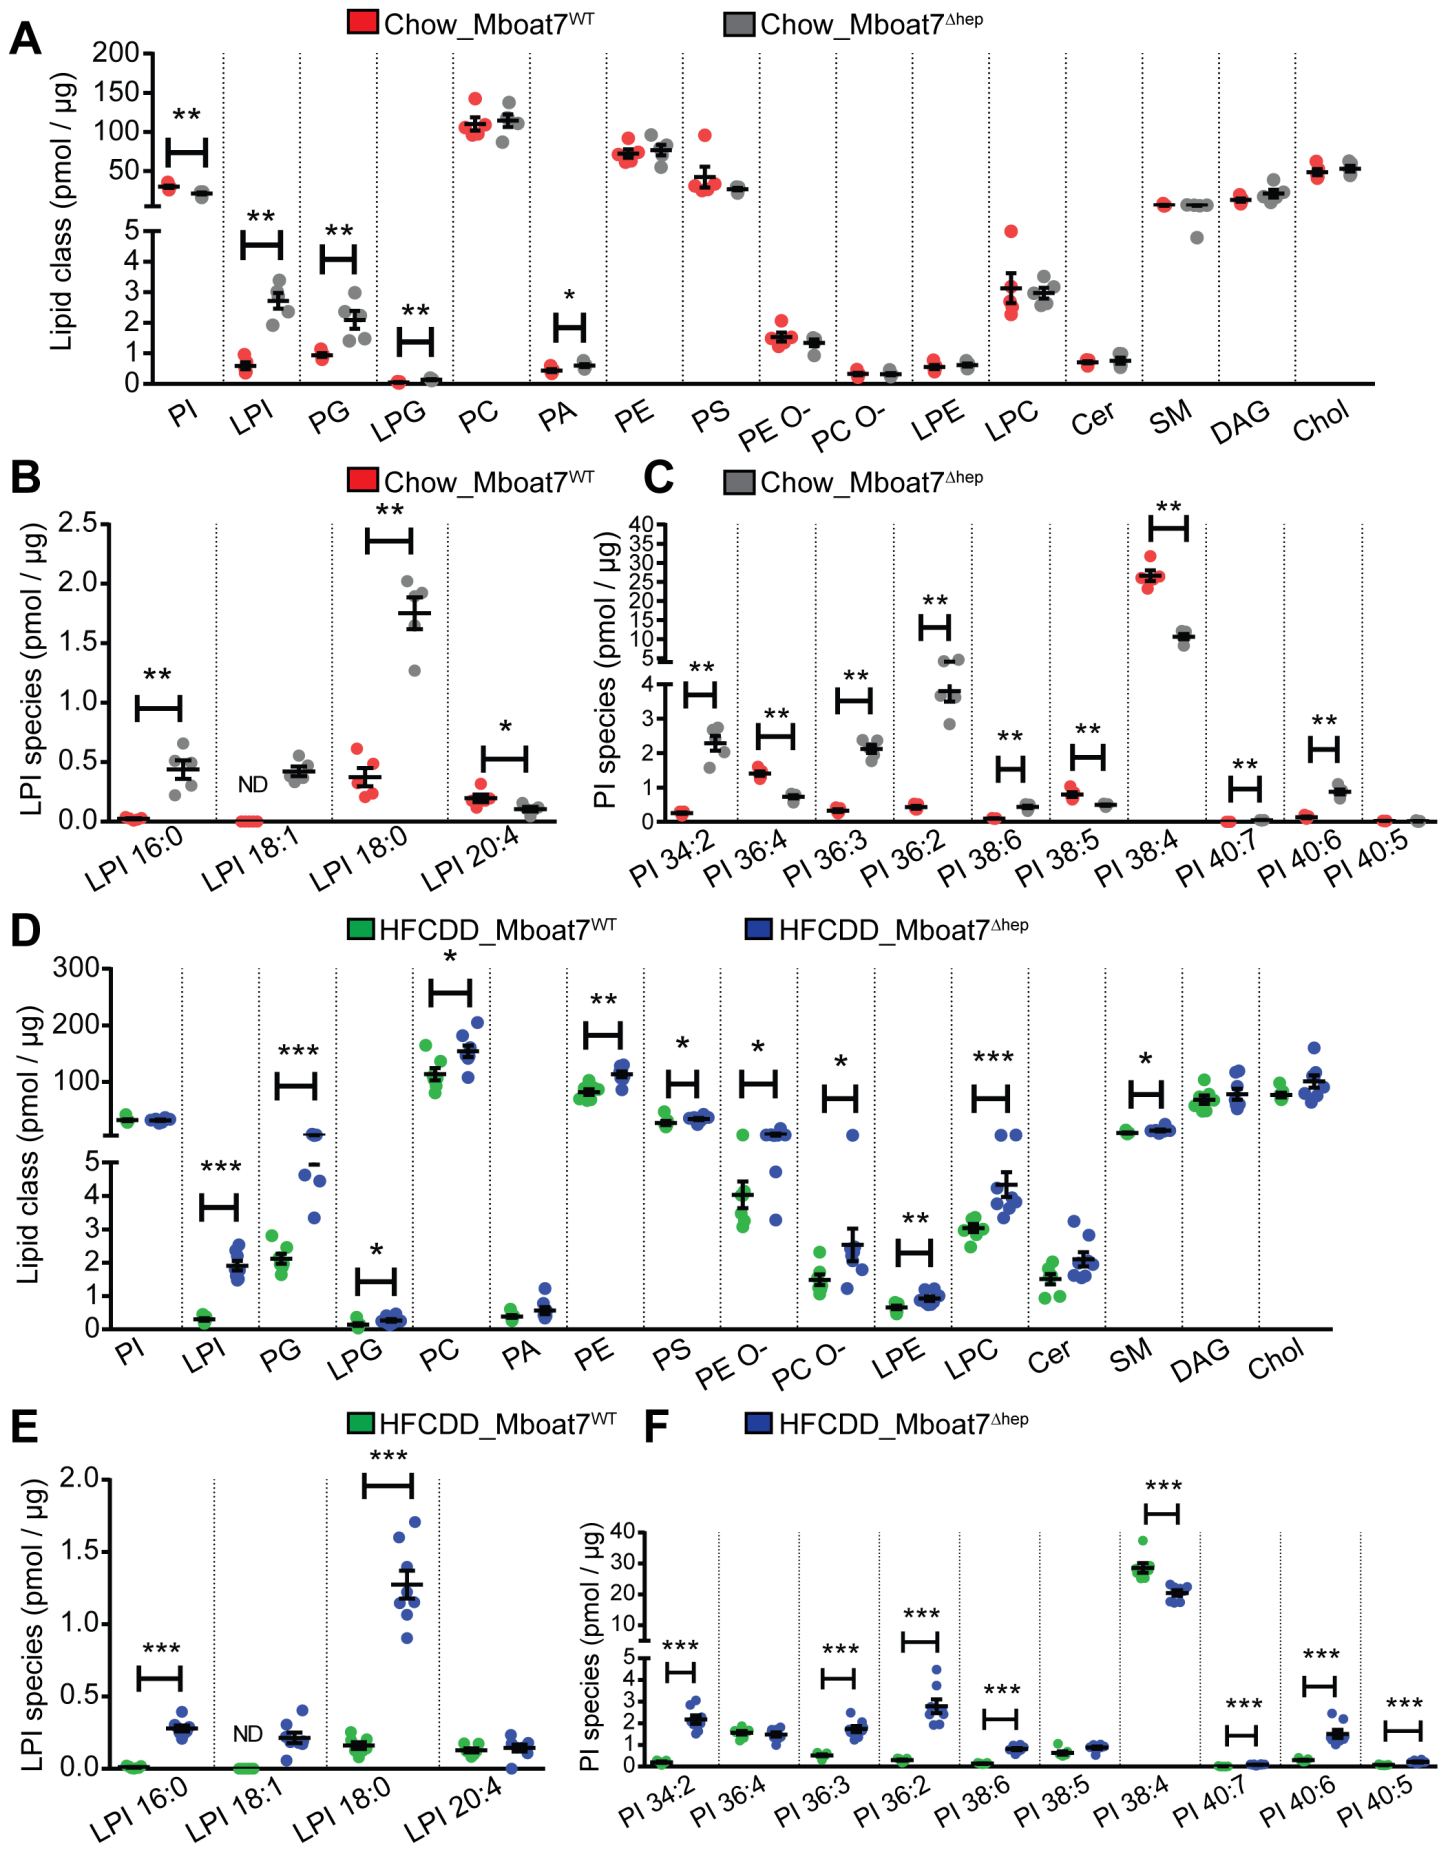

Supplement: inline-supplementary-material-6 [file inline-supplementary-material-6.pdf]

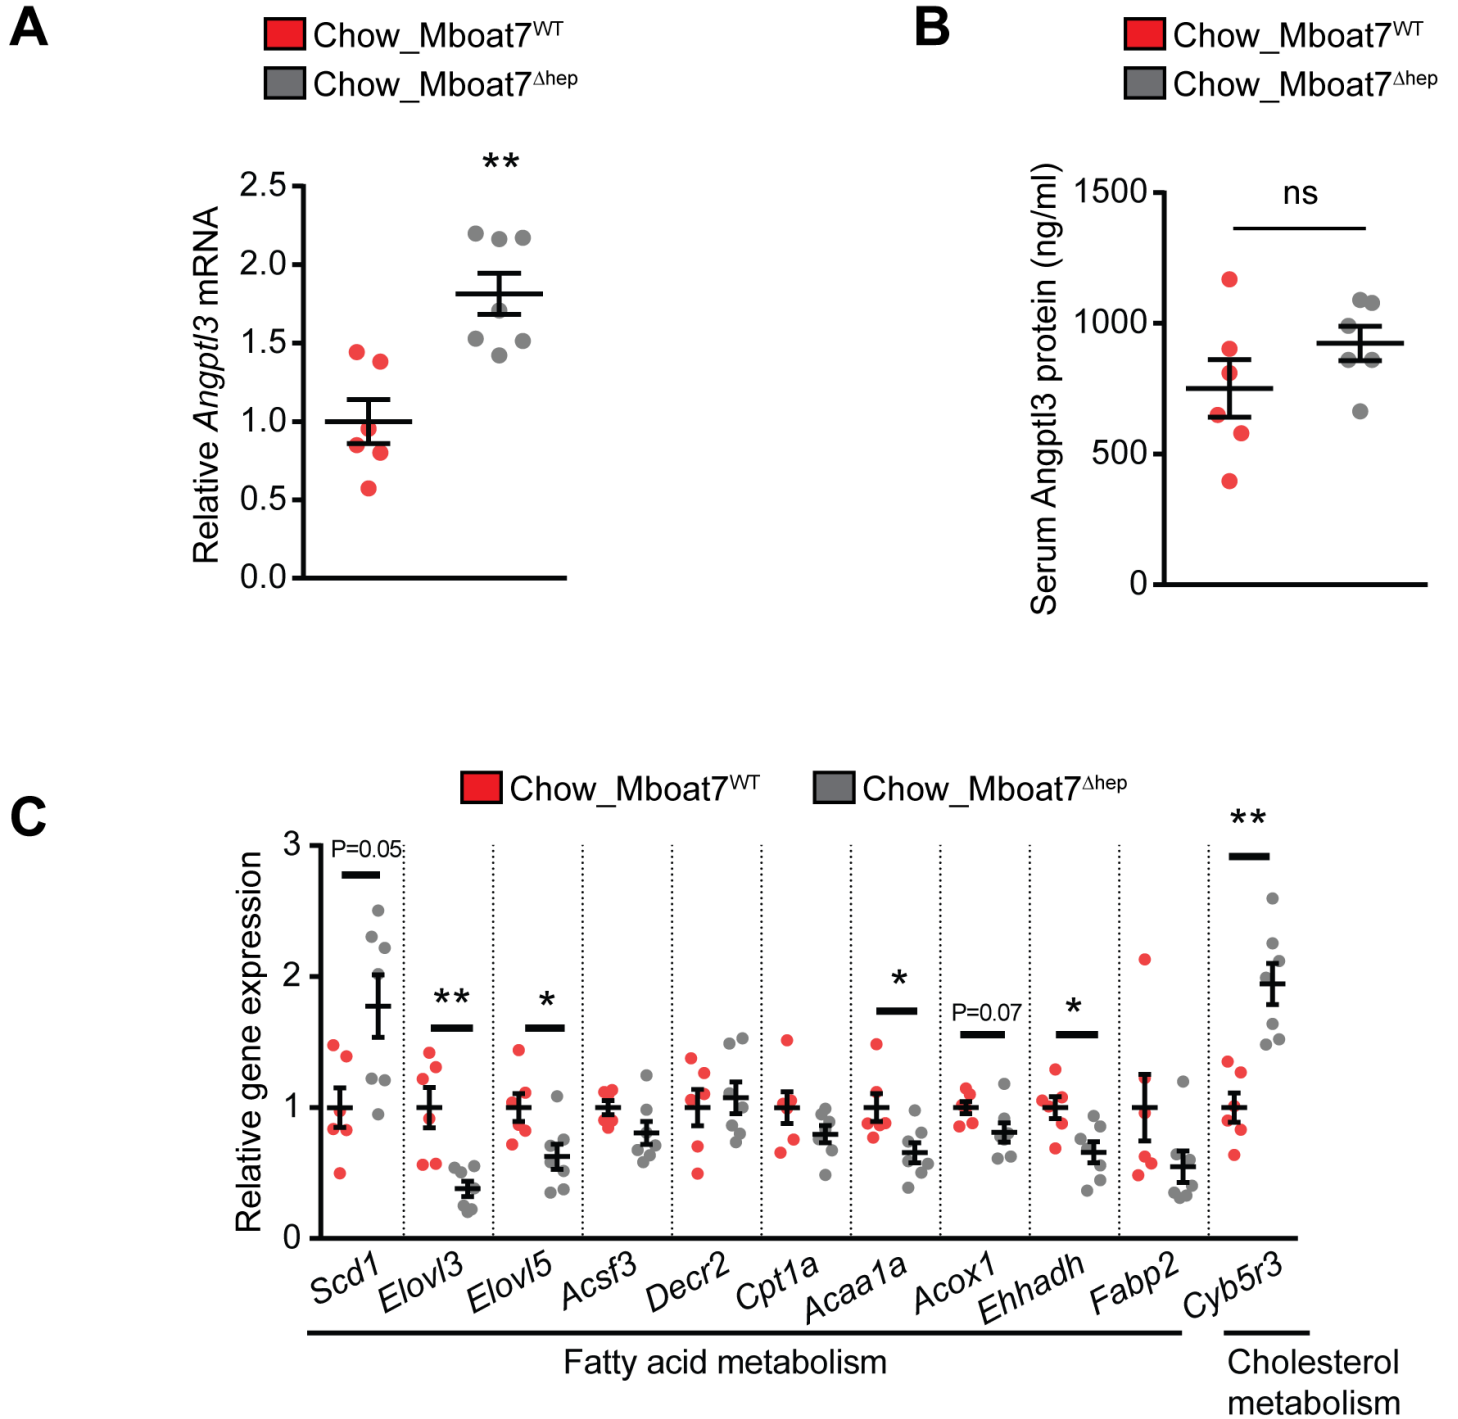

Supplement: inline-supplementary-material-8 [file inline-supplementary-material-8.pdf]
